# Supplementary material for: Metabolic Profiling of Thymic Epithelial Tumors Hints to a Strong Warburg Effect, Glutaminolysis and Precarious Redox Homeostasis as Potential Therapeutic Targets
Source: MDPI journal article supplement (doi:10.3390/cancers14061564), 2022-03-18
Supplement: s1 [file s1]

## Supplementary Tables

**Table S1.** Primers for quantifying mRNA levels of 28 selected genes in the 51 snap-frozen thymic epithelial tumors including the 15 samples, that were studied by HRMAS <sup>1</sup>H-NMR. GAPDH was used as housekeeping gene in the qPCR analysis and determination of relative gene expression levels using the  $\Delta\Delta C_t$  method. Gene names are given in Table S2.

| Gene Name | Primer Forward           | Primer reverse            |
|-----------|--------------------------|---------------------------|
| ADSL      | CCGCTCTTCCCTGGTCCAGTC    | GATTTTCGTTTAATTCTCTTC     |
| ALDH9A1   | CCTGGAGCGAGTCCTCGGGTT    | CCCCTCCAGAACCTCGGCT       |
| ALOX12    | AGAAAAGTTGACTAGTCCAGTGT  | AAAAGCTGTGCTAAACCAATTCCGA |
| ASS1      | CTCCACGATGTCAATACGGC     | CAACACCCCTGACATTCTCG      |
| CBS       | CCACATCACCACACTGCC       | GCCGAACCTCTTCCCAATCT      |
| GAPDH     | TCGACAGTCAGCCGCATCT      | CCGTTGACTCCGACCTTCA       |
| GCLC      | TGTCGCTGGGGAGTGATTTT     | CAATGCCTTCTGCAACAGC       |
| HK1       | AATGCTGGGAAACAAAGGT      | AGAGGAATCCCTTCTTGGG       |
| HK3       | GTGGCATTTCATGGAATGGG     | AACCCTTGGTCCAGTTCAGG      |
| HPRT1     | TGGACAGGACTGAACGTCTTG    | CCAGCAGGTCAGCAAAGAATTTA   |
| IDH1      | GGTAAAACCTATCATCATAGGTCG | CACATACAAGTTGGAAATTTCTGG  |
| IDH2      | GCTGCAGTGGGACCAC TATT    | CTCTGCAGTACAAGGC CACA     |
| IMPDH     | TTCGTGCCCTACCTCATAGC     | ATGGACCGAAGGACAGACAG      |
| MGST1     | ATTGGCCTCTGTATTCCTTG     | TAATCCCTCTGCTCCCCTCC      |
| NOS2      | GACTGTTGAGATGGAAGAAC     | ATCTTCTGTCTCCGAGGCG       |
| NOS3      | GTGATGGCGAAGCGAGTGAAG    | CCGAGCCCCGAACACACAGAAC    |
| PADI1     | CACAGCTCTGGTTGGCTTCA     | CTGCACGTCCTTCAGCATCA      |
| PADI2     | TGAAGCACTCGGAACACGT      | TTGTCAGTCTGGCCTCG         |
| PDK1      | CTGTGATACGGATCAGAAACCG   | TCCACCAAACAATAAAGAGTGCT   |
| PKM2      | CCATTACCAGCGACCCACAG     | GGGCACGTGGGCGGTATCT       |
| PYCR1     | CCTACGGGGCTGCCAAGAT      | ACTCT CCAGCACATGCAAGG     |
| SCO2      | TCACTCACTGCCCTGACATC     | CGGTCAGACCCAACAGTCTT      |
| SHMT2     | CGAGTTGCGATGCTGTACTT     | CTGCGTTGCTGTGCTGAG        |
| SLC16A14  | TGAAGACGACCGAAAGGCTAA    | ATGTGAACAAAGAAGGACGAGAG   |
| SLC16A3   | CGTTCTGGGATGGGACTGAC     | ATGTGCCTCTGGACCATGTG      |
| SLC1A4    | GACCGTACGGAGTCGAGAAG     | GGGGGTTTCCTTCTCAGTG       |
| SLC1A5    | AAGCACATCAGCCGTTTCAT     | AGTGAGGACACCTCCAGCAG      |
| SLC2A1    | GGCCAAGAGTGTGCTAAAGAA    | ACAGCGTTGATGCCAGACAG      |
| SLC3A2    | ACTTGGCTGAGTGGCAGAAT     | AGATCGCTGGTGGATTCAAG      |

**Table S2.** Official full names of the 90 genes from the TCGA thymic epithelial tumor (TET) dataset [4] used for functional annotation clustering using 'DAVID'. The subset of 53 genes in bold represent the genes differentially expressed between individual TET types with similar lymphocyte contents but different (indolent versus aggressive) biological behavior (as detailed in Table S7). The subset of 28 genes whose expression was validated using qPCR in the Mannheim cohort of TETs are in red.

| Gene abbrevi-<br>ation | Official Gene Name                               |
|------------------------|--------------------------------------------------|
| ACSL1                  | acyl-CoA synthetase long-chain family member 1   |
| ADA                    | adenosine deaminase                              |
| ADCY10                 | adenylate cyclase 10                             |
| <b>ADSL</b>            | <b>adenylosuccinase</b>                          |
| <b>ALDH4A1</b>         | <b>aldehyde dehydrogenase 4 family member A1</b> |
| <b>ALDH9A1</b>         | <b>aldehyde dehydrogenase 9 family member A1</b> |
| <b>ALDOA</b>           | <b>aldolase, fructose-bisphosphate A</b>         |
| <b>ALOX12</b>          | <b>arachidonate 12-lipoxygenase, 12S type</b>    |
| <b>ANPEP</b>           | <b>Alanine Aminopeptidase, Membrane</b>          |
| <b>ARG1</b>            | <b>arginase 1</b>                                |
| ARSD                   | arylsulfatase D                                  |
| ASL                    | argininosuccinate lyase                          |
| <b>ASS1</b>            | <b>argininosuccinate synthase 1</b>              |
| BCAT1                  | branched chain amino acid transaminase 1         |
| BCAT2                  | branched chain amino acid transaminase 2         |

|               |                                                                                                                            |
|---------------|----------------------------------------------------------------------------------------------------------------------------|
| CAD           | carbamoylphosphate synthase 2, aspartate transcarbamylase and dihydroorotase                                               |
| <b>CBS</b>    | <b>cystathionine-beta-synthase</b>                                                                                         |
| CNDP2         | CNDP dipeptidase 2 (metallopeptidase M20 family)                                                                           |
| DAO           | D-amino acid oxidase                                                                                                       |
| DCK           | deoxycytidine kinase                                                                                                       |
| DHCR24        | 24-dehydrocholesterol reductase                                                                                            |
| FBP1          | fructose-bisphosphatase 1                                                                                                  |
| FOLH1         | folate hydrolase 1                                                                                                         |
| GART          | phosphoribosylglycinamide formyltransferase, phosphoribosylglycinamide synthetase, phosphoribosylaminoimidazole synthetase |
| <b>GCLC</b>   | <b>glutamate-cysteine ligase catalytic subunit</b>                                                                         |
| GFPT1         | glutamine--fructose-6-phosphate transaminase 1                                                                             |
| GFPT2         | glutamine-fructose-6-phosphate transaminase 2                                                                              |
| GGT6          | gamma-glutamyltransferase 6                                                                                                |
| GOT1          | glutamic-oxaloacetic transaminase 1                                                                                        |
| GOT2          | glutamic-oxaloacetic transaminase 2                                                                                        |
| GPX1          | glutathione peroxidase 1                                                                                                   |
| GPX2          | glutathione peroxidase 2                                                                                                   |
| GPX3          | glutathione peroxidase 3                                                                                                   |
| GPX4          | glutathione peroxidase 4                                                                                                   |
| GSTK1         | glutathione S-transferase kappa 1                                                                                          |
| <b>HK1</b>    | <b>hexokinase 1</b>                                                                                                        |
| HK2           | hexokinase 2                                                                                                               |
| <b>HK3</b>    | <b>hexokinase 3</b>                                                                                                        |
| <b>HPRT1</b>  | <b>hypoxanthine phosphoribosyltransferase 1</b>                                                                            |
| <b>IMPDH1</b> | <b>inosine monophosphate dehydrogenase 1</b>                                                                               |
| <b>IDH1</b>   | <b>isocitrate dehydrogenase (NADP(+)) 1, cytosolic</b>                                                                     |
| <b>IDH2</b>   | <b>isocitrate dehydrogenase (NADP(+)) 2, cytosolic</b>                                                                     |
| KEAP1         | kelch like ECH associated protein 1                                                                                        |
| LAP3          | leucine aminopeptidase 3                                                                                                   |
| MCCC2         | methylcrotonoyl-CoA carboxylase 2                                                                                          |
| MDH1          | malate dehydrogenase 1                                                                                                     |
| <b>MGST1</b>  | <b>microsomal glutathione S-transferase 1</b>                                                                              |
| <b>MGST2</b>  | <b>microsomal glutathione S-transferase 2</b>                                                                              |
| NAT8L         | N-acetyltransferase 8 like                                                                                                 |
| NCF1          | neutrophil cytosolic factor 1                                                                                              |
| NCF2          | neutrophil cytosolic factor 2                                                                                              |
| NIT2          | nitrilase family member 2                                                                                                  |
| NOS1          | nitric oxide synthase 1                                                                                                    |
| <b>NOS2</b>   | <b>nitric oxide synthase 2</b>                                                                                             |
| <b>NOS3</b>   | <b>nitric oxide synthase 3</b>                                                                                             |
| NT5C3A        | 5'-nucleotidase, cytosolic IIIA                                                                                            |
| NUDT2         | nudix hydrolase 2                                                                                                          |
| P4HA1         | prolyl 4-hydroxylase subunit alpha 1                                                                                       |
| <b>PADI1</b>  | <b>peptidyl arginine deiminase 1</b>                                                                                       |
| <b>PADI2</b>  | <b>peptidyl arginine deiminase 2</b>                                                                                       |
| PADI3         | peptidyl arginine deiminase 3                                                                                              |
| PADI4         | peptidyl arginine deiminase 4                                                                                              |
| PADI6         | peptidyl arginine deiminase 6                                                                                              |
| PCK2          | Phosphoenolpyruvate Carboxykinase 2                                                                                        |
| <b>PDK1</b>   | <b>pyruvate dehydrogenase kinase 1</b>                                                                                     |
| PDK4          | pyruvate dehydrogenase kinase 4                                                                                            |
| PFKFB3        | 6-phosphofructo-2-kinase/fructose-2,6-biphosphatase 3                                                                      |
| PFKFB4        | 6-phosphofructo-2-kinase/fructose-2,6-biphosphatase 4                                                                      |
| PFKM          | phosphofructokinase, muscle                                                                                                |
| PHGDH         | phosphoglycerate dehydrogenase                                                                                             |
| <b>PKM2</b>   | <b>pyruvate kinase muscle 2</b>                                                                                            |
| PNP           | purine nucleoside phosphorylase                                                                                            |
| PRMT1         | protein arginine methyltransferase 1                                                                                       |
| PRODH         | proline dehydrogenase 1                                                                                                    |
| PSPH          | phosphoserine phosphatase                                                                                                  |
| <b>PYCR1</b>  | <b>pyrroline-5-carboxylate reductase 1</b>                                                                                 |
| RIMKLA        | ribosomal modification protein rimK like family member A                                                                   |

|                 |                                                               |
|-----------------|---------------------------------------------------------------|
| <b>SCO2</b>     | <b>SCO2, cytochrome c oxidase assembly protein</b>            |
| SDS             | serine dehydratase                                            |
| <b>SHMT2</b>    | <b>serine hydroxymethyltransferase 2</b>                      |
| SLC16A1         | solute carrier family 16 member 1                             |
| SLC16A2         | solute carrier family 16 member 2                             |
| <b>SLC16A14</b> | <b>solute carrier family 16 member 14</b>                     |
| <b>SLC16A3</b>  | <b>solute carrier family 16 member 3</b>                      |
| <b>SLC1A4</b>   | <b>solute carrier family 1 member 4</b>                       |
| <b>SLC1A5</b>   | <b>solute carrier family 1 member 5</b>                       |
| <b>SLC2A1</b>   | <b>solute carrier family 2 member 1</b>                       |
| <b>SLC3A2</b>   | <b>solute carrier family 3 member 2</b>                       |
| TAP1            | transporter 1, ATP binding cassette subfamily B member (TAP1) |
| TAP2            | transporter 2, ATP binding cassette subfamily B member (TAP2) |

**Table S3.** Metabolites ( $n = 37$ ) detected overall in 15 thymic epithelial tumors (TETs) using HRMAS  $^1\text{H}$ -NMR spectroscopy. Given are  $p$ -values and incidences. Incidences represent the number of samples (of the 15 TETs investigated), in which the respective metabolite could be detected; in the other cases, metabolite concentrations were assumed to be below the detection threshold of the method and were set as zero in the raw data replaced by imputing during data processing for statistical evaluation as described in section 2.2.  $p$ -values concern the comparison of metabolite levels in the group of indolent TETs (type A, AB, B1 thymomas) and the group of aggressive TETs (type B2 and B3 thymomas and thymic carcinomas). Metabolites ( $n = 7$ ) with significantly different levels between the two groups are shown in bold.  $p$ -values were determined by the Welch two sample  $t$ -test.

| Metabolite            | $p$ -value | Incidence among 15 TETs | Metabolite           | $p$ -value* | Incidence among 15 TETs |
|-----------------------|------------|-------------------------|----------------------|-------------|-------------------------|
| Acetic acid           | 0.593      | 13                      | <b>Inosine</b>       | 0.034       | 12                      |
| Acetylcholine         | 0.571      | 11                      | L-Isoleucine         | 0.926       | 11                      |
| Ascorbic acid         | 0.158      | 14                      | <b>L-Lactic acid</b> | 0.049       | 15                      |
| <b>L-Alanine</b>      | 0.029      | 15                      | L-Lysine             | 0.597       | 9                       |
| L-Aspartic acid       | 0.174      | 11                      | <b>myo-Inositol</b>  | 0.015       | 15                      |
| Choline               | 0.318      | 15                      | Methanol             | 0.964       | 6                       |
| Creatine              | 0.138      | 15                      | L-Methionine         | 0.500       | 3                       |
| <b>L-Cysteine</b>     | 0.0000625  | 8                       | <b>Oxypurinol</b>    | 0.0094      | 10                      |
| Ethanolamine          | 0.157      | 8                       | Phosphorylcholine    | 0.312       | 14                      |
| Formic acid           | 0.444      | 2                       | Phosphoethanolamine  | 0.594       | 12                      |
| Fumaric acid          | 0.427      | 12                      | L-Phenylalanine      | 0.304       | 11                      |
| D-Glucose             | 0.169      | 10                      | L-Proline            | 0.721       | 12                      |
| L-Glutamic acid       | 0.210      | 14                      | L-Serine             | 0.294       | 13                      |
| L-Glutamine           | 0.095      | 14                      | Succinic acid        | 0.599       | 13                      |
| <b>Glutathione</b>    | 0.031      | 10                      | Taurine              | 0.452       | 15                      |
| Glycerol              | 0.334      | 8                       | L-Threonine          | 0.729       | 11                      |
| Glycine               | 0.056      | 15                      | L-Tyrosine           | 0.155       | 9                       |
| Glycerophosphocholine | 0.235      | 15                      | L-Valine             | 0.719       | 14                      |
| L-Histidine           | 0.549      | 7                       |                      |             |                         |

**Table S4.** Metabolite concentrations in the 15 thymic epithelial tumors (TETs) and 4 non-neoplastic thymuses (NTs) as determined by HRMA  $^1\text{H}$ -NMR spectroscopy. Table S4 can be found in the excel file.

**Table S5.** “Area under the curve” (AUC) values obtained from receiver operating characteristic (ROC) curves analysis based on the metabolite levels determined in the 15 thymic epithelial tumors (TETs) analyzed in this study. Nine of the 37 metabolites, namely cysteine, alanine, glutathione, creatine, inosine, alanine, lactic acid, oxypurinol and myo-inositol showed an AUC value larger than 0.8. Of these nine metabolites, seven, i.e. all except creatine and glutamine, showed significantly different concentrations ( $p < 0.05$ ) in indolent compared to aggressive TETs (Table S3).

| Metabolite    | AUC  | Metabolite      | AUC  | Metabolite        | AUC  | Metabolite    | AUC  |
|---------------|------|-----------------|------|-------------------|------|---------------|------|
| Acetic acid   | 0.5  | L-Glutamic acid | 0.64 | Methanol          | 0.74 | L-Serine      | 0.66 |
| Acetylcholine | 0.54 | L-Glutamine     | 0.82 | L-Methionine      | 0.56 | Succinic acid | 0.56 |
| Ascorbic acid | 0.74 | Glutathione     | 0.84 | Oxypurinol        | 0.86 | Taurine       | 0.6  |
| L-Alanine     | 0.86 | Glycerol        | 0.54 | Phosphorylcholine | 0.64 | L-Threonine   | 0.62 |

|                 |      |                       |      |                     |      |            |      |
|-----------------|------|-----------------------|------|---------------------|------|------------|------|
| L-Aspartic acid | 0.7  | Glycine               | 0.72 | Phosphoethanolamine | 0.56 | L-Tyrosine | 0.74 |
| Choline         | 0.62 | Glycerophosphocholine | 0.66 | L-Phenylalanine     | 0.72 | L-Valine   | 0.56 |
| Creatine        | 0.84 | L-Histidine           | 0.62 | L-Proline           | 0.7  |            |      |
| L-Cysteine      | 1    | Inosine               | 0.82 |                     |      |            |      |
| Ethanolamine    | 0.72 | L-Isoleucine          | 0.58 |                     |      |            |      |
| Formic acid     | 0.6  | L-Lactic acid         | 0.82 |                     |      |            |      |
| Fumaric acid    | 0.64 | L-Lysine              | 0.58 |                     |      |            |      |
| D-Glucose       | 0.76 | myo-Inositol          | 0.84 |                     |      |            |      |

**Table S6.** *p*-values and significance levels calculated for the relative expression levels of the 28 genes from Figures S2 and S3 in three different comparisons: Aggressive thymic epithelial tumors (TETs, type B2 and B3 thymomas and thymic carcinomas (TC)) versus (vs) indolent TETs (type A, AB, B1 thymomas); TC vs all thymomas (A, AB, B1, B2, B3) and TC vs B3 thymomas in the Mannheim and TCGA cohorts. Two-tailed student's *t*-test was applied in the comparisons; ns: no significance. "Fairly similar" *p*-values (i.e. concordantly significant or non-significant differences between the two cohorts) are in black, discordant *p*-values are in red. In both cohorts, relative expressions showed "fair similarity" in 26 of 28 genes in the 1<sup>st</sup> comparison (aggressive vs indolent TETs), in 24 of 28 in the 2<sup>nd</sup> comparison (TC vs all thymomas) and in 21 of 28 in the 3<sup>rd</sup> comparison (TC vs type B3 thymomas).

| Expressed Gene | B2,B3,TC vs A,AB,B1 |              | TC vs A,AB,B1,B2, B3 |              | TC vs B3     |           |
|----------------|---------------------|--------------|----------------------|--------------|--------------|-----------|
|                | Mannheim            | TCGA         | Mannheim             | TCGA         | Mannheim     | TCGA      |
| ADSL           | 0.0001 ***          | ns           | ns                   | ns           | 0.0016 **    | ns        |
| ALDH9A1        | 0.007 **            | 0.0005 ***   | ns                   | ns           | 0.0112 *     | ns        |
| ALOX12         | 0.0025 **           | 0.035 *      | <0.0001 ****         | 0.0114 *     | 0.0044 **    | ns        |
| ASS1           | 0.0032 **           | 0.0002 ***   | ns                   | ns           | 0.0025 **    | 0.006 **  |
| PADI1          | 0.0046 **           | 0.0017 **    | 0.0004 ***           | 0.0003 ***   | ns           | ns        |
| PADI2          | 0.0002 ***          | 0.0002 ***   | <0.0001 ****         | ns           | 0.0007 ***   | 0.0067 ** |
| CBS            | <0.0001 ****        | 0.0005 ***   | ns                   | ns           | ns           | ns        |
| GCLC           | 0.0011 **           | 0.047 *      | <0.0001 ****         | <0.0001 **** | 0.0040 **    | 0.0161 *  |
| HK1            | 0.0001 ***          | <0.0001 **** | <0.0001 ****         | <0.0001 **** | ns           | ns        |
| HK3            | <0.0001 ****        | 0.016 *      | <0.0001 ****         | 0.0432 *     | 0.0055 **    | 0.0374 *  |
| HPRT1          | <0.0001 ****        | <0.0001 **** | ns                   | ns           | ns           | ns        |
| IDH1           | 0.0002 ***          | 0.0025 **    | <0.0001 ****         | <0.0001 **** | 0.0078 **    | 0.002 **  |
| IDH2           | ns                  | ns           | ns                   | ns           | ns           | ns        |
| IMPDH1         | <0.0001 ****        | 0.0001 ***   | ns                   | 0.0347       | ns           | ns        |
| MGST1          | 0.022 *             | <0.0001 **** | ns                   | ns           | ns           | ns        |
| NOS2           | 0.0022 **           | 0.00056 ***  | <0.0001 ****         | <0.0001 **** | 0.0005 ***   | 0.0418 *  |
| NOS3           | 0.0001 ***          | 0.0024 **    | <0.0001 ****         | <0.0001 **** | ns           | 0.006 **  |
| PDK1           | 0.0038 **           | <0.0001 **** | 0.0003 ***           | <0.0001 **** | 0.030 *      | 0.027 *   |
| PMK2           | 0.0015 **           | <0.0001 **** | ns                   | 0.0121*      | ns           | ns        |
| PYCR1          | <0.0001 ****        | <0.0001 **** | <0.0001 ****         | <0.0001 **** | 0.0024 **    | 0.0017 ** |
| SCO2           | 0.041 *             | 0.028 *      | <0.0001 ****         | <0.0001 **** | 0.0026 **    | ns        |
| SHMT2          | 0.0001 ***          | 0.0112 *     | <0.0001 ****         | 0.0002 ***   | ns           | 0.0037 ** |
| SLC16A14       | 0.0115 *            | 0.016 *      | ns                   | ns           | 0.0462 *     | 0.0095 ** |
| SLC16A3        | 0.035 *             | 0.0015 **    | ns                   | <0.0001 **** | ns           | 0.01 *    |
| SLC1A4         | ns                  | ns           | ns                   | ns           | ns           | ns        |
| SLC1A5         | 0.003 **            | 0.0526 *     | <0.0001 ****         | <0.0001 **** | 0.05 *       | 0.022 **  |
| SLC2A1         | 0.0021 **           | 0.0001 ***   | <0.0001 ****         | <0.0001 **** | <0.0001 **** | 0.0022 ** |
| SLC3A2         | ns                  | 0.0003 ***   | ns                   | ns           | ns           | ns        |

\*<0.05; \*\*<0.01; \*\*\*<0.001, \*\*\*\*<0.0001.

**Table S7.** Comparison of relative expression levels of 53 genes between indolent thymic epithelial tumors (TETs, i.e. type A, AB and B1 thymomas) and aggressive TETs (type B2 and B3 thymomas)

and thymic carcinomas (TC) of the TCGA cohort taking the contents of lymphoid cells into account. Lymphoid cell contents were typically low in type A and B3 thymomas and TC but high in type AB, B1 and B2 thymomas (Table 1). Statistical analysis of comparisons of type A with B3 thymomas, type A thymomas with TC (lymphocyte-poor TETs) and of AB plus B1 thymomas with B2 thymomas (lymphocyte-rich TETs). Two-tailed student's *t*-test and one-Way ANOVA were applied in the A vs B3, type A vs TC and AB+B1 vs B2 comparisons, respectively.

| Gene    | A vs TC      | A vs B3      | AB+B1 vs B2  |
|---------|--------------|--------------|--------------|
| ADCY10  | 0.0002 ***   | ns           | 0.0011 **    |
| ADSL    | 0.0141 *     | ns           | <0.0001 **** |
| ALDH4A1 | ns           | ns           | 0.0009 ***   |
| ALDH9A1 | ns           | 0.038 *      | 0.0009 ***   |
| ALDOA   | 0.0125 *     | 0.0165 *     | <0.0001 **** |
| ALOX12  | 0.0037 **    | ns           | ns           |
| ANPEP   | ns           | ns           | <0.0001 **** |
| ARG1    | 0.0403 *     | <0.0001 **** | 0.0003 ***   |
| ASS1    | ns           | 0.0013 **    | 0.007 **     |
| CBS     | ns           | 0.0123 *     | ns           |
| DCK     | ns           | ns           | 0.0032 **    |
| FBP1    | 0.0091 **    | ns           | 0.0056 **    |
| FOLH1   | 0.0091 **    | ns           | 0.0059 **    |
| GART    | <0.0001 **** | 0.0435 *     | 0.0013 **    |
| GCLC    | 0.0053 **    | ns           | ns           |
| GGT6    | <0.0001 **** | ns           | 0.0099 **    |
| GOT1    | 0.0418 *     | 0.0235 *     | <0.0001 **** |
| GSTK1   | ns           | ns           | 0.0064 **    |
| HK1     | 0.0043 **    | 0.0045 **    | <0.0001 **** |
| HK3     | ns           | ns           | 0.0004 ***   |
| HPRT1   | 0.0002 ***   | 0.0029 **    | <0.0001 **** |
| IDH1    | <0.0001 **** | ns           | ns           |
| IDH2    | 0.0006 ***   | 0.0002 ****  | 0.0003 ***   |
| IMPDH1  | 0.0339 *     | 0.0272 *     | 0.0068 **    |
| LAP3    | <0.0001 **** | ns           | ns           |
| MDH1    | ns           | ns           | <0.0001 **** |
| MGST1   | 0.0015 **    | <0.0001 **** | 0.0159 *     |
| MGST2   | 0.043 *      | 0.0163 *     | 0.0008 ***   |
| NIT2    | 0.0012 **    | 0.0018 **    | 0.0238 *     |
| NOS2    | 0.0445 *     | ns           | 0.0029 **    |
| NOS3    | 0.0004 ***   | ns           | ns           |
| NT5C3A  | ns           | ns           | 0.0134 *     |
| NUDT2   | ns           | ns           | 0.0263 *     |
| P4HA1   | ns           | ns           | 0.0363 *     |
| PADI1   | 0.0311 *     | ns           | <0.0001 **** |
| PADI2   | ns           | 0.0016 **    | 0.0089 **    |
| PCK2    | ns           | ns           | 0.001 **     |
| PDK1    | 0.0029 **    | ns           | <0.0001 **** |
| PKM2    | 0.0001 ***   | 0.0002 ***   | <0.0001 **** |
| PNP     | <0.0001 **** | 0.0111 *     | 0.015 *      |
| PRODH   | ns           | ns           | 0.0417 *     |
| PSPH    | ns           | ns           | 0.0001 ***   |
| PYCR1   | 0.0226 *     | 0.0005 ***   | 0.0006 ***   |

|          |              |           |              |
|----------|--------------|-----------|--------------|
| RIMKLA   | 0.0251 *     | 0.0062 ** | <0.0001 **** |
| SCO2     | 0.0098 **    | 0,0296 *  | ns           |
| SDS      | 0.0002 ***   | ns        | 0.0011 **    |
| SHMT2    | 0.0005 ***   | ns        | 0.0006 ***   |
| SLC16A14 | 0,0378 *     | ns        | 0,012 *      |
| SLC16A3  | 0.0004 ***   | ns        | 0.0008 ***   |
| SLC1A4   | 0.0117 *     | ns        | 0.006 **     |
| SLC1A5   | <0.0001 **** | ns        | ns           |
| SLC2A1   | <0.0001 **** | ns        | 0.002 **     |
| SLC3A2   | 0.0379 *     | ns        | ns           |

\*<0.05; \*\*<0.01; \*\*\*<0.001, \*\*\*\*<0.0001.
